# Supplementary material for: Inorganic anion induced supramolecular architectures and luminescent properties of flexible bis(pyridyl) based ionic salts
Source: Royal Society of Chemistry journal article supplement (doi:10.1039/c1ce05628j), 2011-01-01
Supplement: c1ce05628j.pdf [file c1ce05628j.pdf]

Electronic Supplementary Information for CrystEngComm

This journal is (c) The Royal Society of Chemistry 2011

Electronic Supplementary Information (ESI)

**Inorganic anion induced supramolecular architectures and  
luminescent properties of flexible bis(pyridyl) based ionic salts**

**Zhao-Peng Deng, Hui-Ling Qi, Li-Hua Huo,<sup>\*</sup> Hui Zhao and Shan Gao<sup>\*</sup>**

Electronic Supplementary Information for CrystEngComm

This journal is (c) The Royal Society of Chemistry 2011

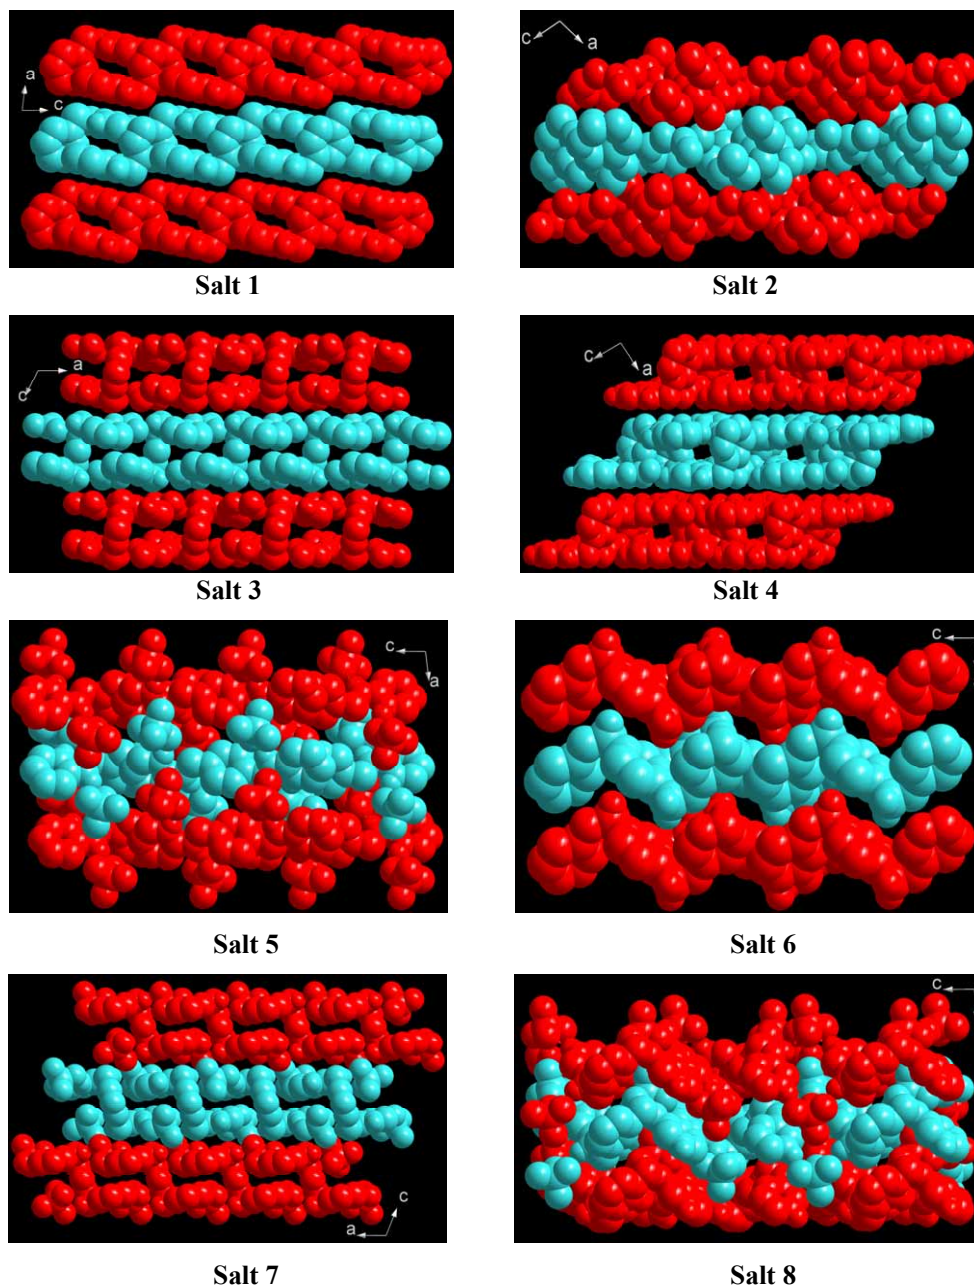

**Fig. S1** Space-filling modes of the packing diagram in salts **1-8** along the [010] direction.

Electronic Supplementary Information for CrystEngComm

This journal is (c) The Royal Society of Chemistry 2011

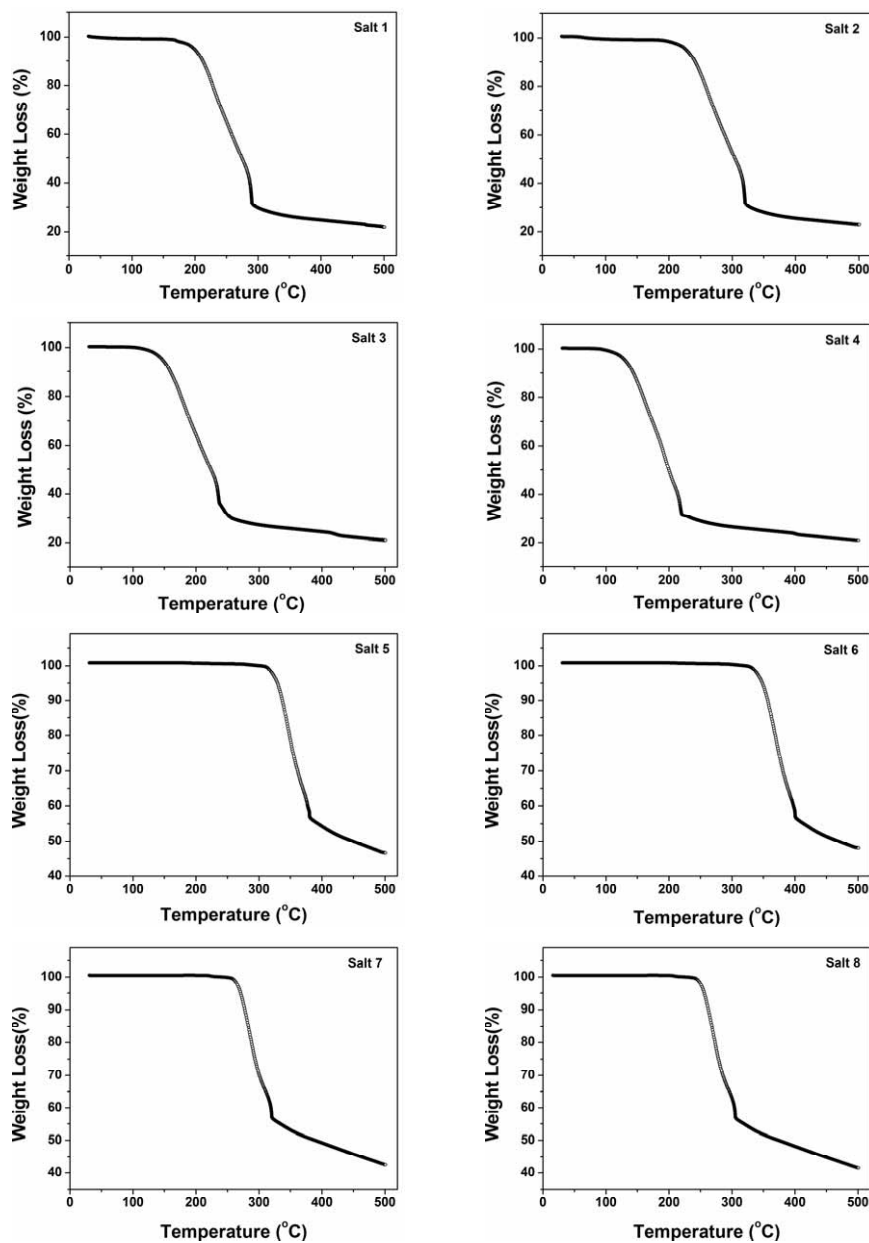

**Fig. S2** TG curves of salts **1-8** at N<sub>2</sub> atmosphere.

The thermal stability of the eight salts was analyzed on crystalline samples by thermogravimetric analyses (TGA) from 30 to 500 °C at a rate of 10 °C min<sup>-1</sup> under N<sub>2</sub> atmosphere. As shown in Fig. S2, the thermal stability of the perchlorates is higher than the corresponding nitrates. The sharp weight loss of the eight salts is falling in the range of 162-290 °C, 190-320 °C, 107-258 °C, 90-220 °C, 305-380 °C, 320-402 °C, 247-320 °C, and 235-305 °C, respectively.

Electronic Supplementary Information for CrystEngComm

This journal is (c) The Royal Society of Chemistry 2011

**Table S1** Selected bond angles ( $^{\circ}$ ) data of salts **1-8**

|                 |          | <b>1</b>        |          |
|-----------------|----------|-----------------|----------|
| O(2)-N(3)-O(1)  | 121.1(3) | O(1)-N(3)-O(3)  | 119.1(3) |
| O(2)-N(3)-O(3)  | 119.8(3) |                 |          |
|                 |          | <b>2</b>        |          |
| O(2)-N(3)-O(1)  | 118.9(2) | O(3)-N(3)-O(1)  | 118.8(3) |
| O(2)-N(3)-O(3)  | 122.3(3) |                 |          |
|                 |          | <b>3</b>        |          |
| O(2)-N(3)-O(1)  | 120.5(2) | O(3)-N(3)-O(1)  | 120.1(2) |
| O(3)-N(3)-O(2)  | 119.4(2) |                 |          |
|                 |          | <b>4</b>        |          |
| O(1)-N(5)-O(2)  | 121.2(5) | O(4)-N(6)-O(5)  | 122.5(5) |
| O(2)-N(5)-O(3)  | 118.6(5) | O(5)-N(6)-O(6)  | 118.0(5) |
| O(1)-N(5)-O(3)  | 120.2(5) | O(4)-N(6)-O(6)  | 119.5(5) |
|                 |          | <b>5</b>        |          |
| O(1)-Cl(1)-O(2) | 107.3(6) | O(4)-Cl(1)-O(3) | 111.0(4) |
| O(3)-Cl(1)-O(2) | 107.6(4) | O(1)-Cl(1)-O(4) | 112.1(5) |
|                 |          | <b>6</b>        |          |
| O(2)-Cl(1)-O(1) | 110.2(2) | O(3)-Cl(1)-O(4) | 109.4(2) |
| O(2)-Cl(1)-O(3) | 109.6(2) | O(4)-Cl(1)-O(1) | 108.7(2) |
|                 |          | <b>7</b>        |          |
| O(2)-Cl(1)-O(1) | 112.6(4) | O(3)-Cl(1)-O(4) | 110.1(4) |
| O(2)-Cl(1)-O(3) | 110.2(3) | O(4)-Cl(1)-O(1) | 106.2(3) |
|                 |          | <b>8</b>        |          |
| O(1)-Cl(1)-O(2) | 110.4(3) | O(5)-Cl(2)-O(6) | 109.4(3) |
| O(2)-Cl(1)-O(3) | 108.1(3) | O(6)-Cl(2)-O(7) | 108.1(3) |
| O(3)-Cl(1)-O(4) | 108.3(3) | O(8)-Cl(2)-O(7) | 108.7(3) |
| O(1)-Cl(1)-O(4) | 110.6(3) | O(5)-Cl(2)-O(8) | 109.1(3) |
